# Supplementary material for: Separation and Concentration of Nitrogen and Phosphorus in a Bipolar Membrane Electrodialysis System
Source: MDPI journal article supplement (doi:10.3390/membranes12111116), 2022-11-08
Supplement: s1 [file s1]

# Separation and Concentration of Nitrogen and Phosphorus in a Bipolar Membrane Electrodialysis System

## S1 Details of membranes

**Table S1.** Characteristics of membranes.

| Parameters                             | CEM         | AEM   | BPM     |
|----------------------------------------|-------------|-------|---------|
| Thickness ( $\mu\text{m}$ )            | 50.8        | 420   | 170–260 |
| Conductivity (S/cm)                    | 0.083       | 0.083 | -       |
| Exchange capacity (mol/kg)             | 0.95–1.01   | 2.2   | -       |
| Moisture content (%)                   | $5 \pm 3.0$ | 42    | -       |
| Rupture strength (MPa)                 | -           | 0.6   | 0.4–0.7 |
| Selective transmission coefficient (%) | -           | 90    | -       |
| Water decomposition voltage (V)        | -           | -     | 0.9–1.7 |
| Water decomposition efficiency (%)     | -           | -     | >98     |

## S2 Changes of pH in different compartment

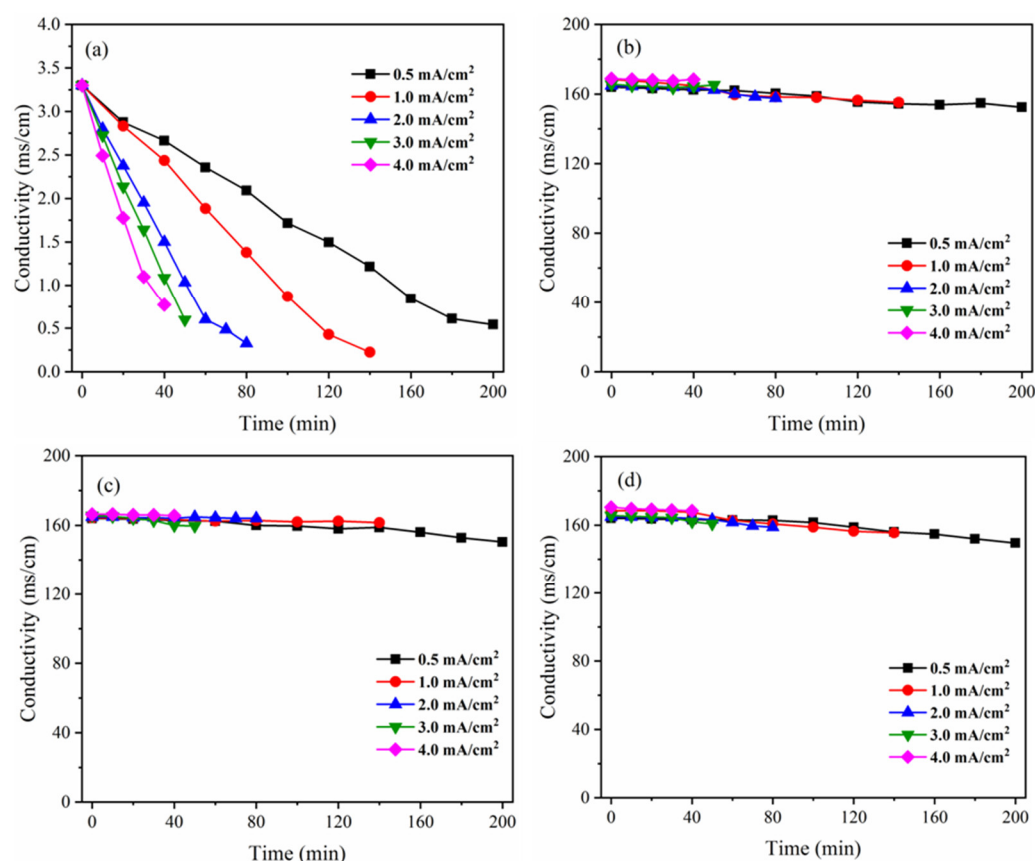

**Figure S1.** Changes of solution conductivity in (a) wastewater compartment, (b) ammonia compartment, (c) phosphate compartment and (d) nitric acid compartment under different current density.
